# Supplementary material for: Face, Content, and Construct Validity Evaluation of Simulation Models in General Surgery Laparoscopic Training and Education: A Systematic Review.
Source: Research Square preprint supplement (doi:10.21203/rs.3.rs-1436353/v1), 2022-03-28
Supplement: Supplementary file 1 [file 14dfea6a01a743abfbae03f4.docx]

[ANNEX 1] SUMMARY VARIABLES

| Name | Definition |
| --- | --- |
| Authors | Authors of the article |
| Article Tittle | Original title of the article |
| Journal | Journal where the article was published |
| Language | Original language of the manuscript |
| Country | Country of origin / Adress |
| Year | Year of publication in numbers |
| DOI | Digital object identifier number |
| Number of pages | How many pages does the article have, in numbers |
| Population | Define if the population of the study are MEDICAL STUDENTS, RESIDENTS, SURGERONS. And as sub-item we added the PREVIOUSLY TRAINNING in laparoscopic surgery. |
| (n=X) Sample size | Sample size in numbers and characteristics |
| Objective variables | Type and definition of variables used in the Paper |
| Evaluation | How the evaluation was made |
| Ethical approval | Does the authors have an ethical approval when applies. |
| Type of validation | Which validation did the authors used in the article: face, content or construct.  0. None  1. Face  2. Content  3. Construct  4. 1y2  5. 2y3  6. 1y3  7.1,2y3 |
| Conflicts of interest | Is there was a conflict of interest declared by the authors, mentioned in the article when applies. |
| Comparison | Methods compared when applied |
| Analytical approach | Which analytical approach does the Authors used (Lineal, logistic, etc.) |
| Surgical simulation | If the sample practiced a surgical procedure during laparoscopic surgery, and which one. |
| Laparoscopic simulation | If the sample did not practiced a a surgical procedure during laparoscopic surgery, but they explored the cavity. |
| Outcome reported | The main outcome reported by the study. |
| Included / Excluded | Decision if the article can be included or excluded |
